# Supplementary material for: A global long term (1981–2019) daily land surface radiation budget product from AVHRR satellite data using a residual convolutional neural network
Source: Copernicus journal article supplement (doi:10.5194/essd-2021-250), 2021-09-17
Supplement: Supplementary file 1 [file essd-2021-250-supplement.pdf]

### S5.1 Examination of spatial adjacent effect using the MLR model

To ensure that the RCNN model retrieves  $R_n$  measurements with the highest possible accuracy, it is crucial to determine the optimal spatial size of the input image block. If the size of the input image is too small, insufficient vicinity information is input into the RCNN, whereas if the spatial size of the tensor is too large, irrelevant redundant information is included that can negatively affect retrieval accuracy.

In this study, we utilized a simple method to investigate the effects that different spatial scales can have on the retrieval accuracy of surface  $R_n$  using AVHRR data. Specifically, spatial scale effects on  $R_n$  retrieval were quantified by observing the response of the built model's performance to changes in input image block sizes. In this study, a multivariate linear regression model (MLR) was adopted to account for spatial scale effects. When  $m$  response observations and  $n$  explanatory variables are given, the MLR model can be mathematically expressed as:

$$y_i = \alpha_0 + \alpha_1 x_{i1} + \alpha_2 x_{i2} + \dots + \alpha_n x_{in} + \varepsilon_i, \quad i = 1, 2, 3, \dots, m \quad \text{Eq. (1)}$$

where  $x$  and  $y$  represent explanatory and response variables, respectively;  $\alpha$  is the fitting coefficient, and  $\varepsilon$  is the notation for mode deviations. The best-fitting line can be obtained by minimizing the sum of squares of the vertical deviations using the ordinary least squares method. In this study, the explanatory variables ( $n = 25$ ) are statistical parameters—including maximum, minimum, mean, median, and variance values—that describe the associated input image blocks in different channels; the corresponding response variable is surface  $R_n$ . To maintain the consistency of the MLR model structure at different spatial scales, statistical parameters, rather than pixel values,

were taken as MLR inputs. The performance of the built MLR model performance was observed under varying spatial scales because the statistical parameters of valid images are affected by the input size.

**Table S1.** The detailed information of collected 537 sites.

| <b>Station name</b>   | <b>Latitude<br/>(°)</b> | <b>Longitude<br/>(°)</b> | <b>Elevation<br/>(m)</b> | <b>Land cover</b> |
|-----------------------|-------------------------|--------------------------|--------------------------|-------------------|
| <b>Training sites</b> |                         |                          |                          |                   |
| ARM_E01               | 38.202                  | -99.316                  | 632                      | CRO               |
| ARM_E02               | 38.31                   | -97.3                    | 447                      | GRA               |
| ARM_E03               | 38.201                  | -95.597                  | 338                      | CRO               |
| ARM_E04               | 37.95                   | -98.33                   | 513                      | GRA               |
| ARM_E05               | 38.114                  | -97.513                  | 440                      | CRO               |
| ARM_E07               | 37.38                   | -96.18                   | 283                      | GRA               |
| ARM_E08               | 37.33                   | -99.31                   | 664                      | GRA               |
| ARM_E09               | 37.13                   | -97.27                   | 386                      | GRA               |
| ARM_E10               | 37.068                  | -95.788                  | 248                      | CRO               |
| ARM_E11               | 36.881                  | -98.285                  | 360                      | GRA               |
| ARM_E12               | 36.84                   | -96.43                   | 331                      | GRA               |
| ARM_E13               | 36.61                   | -97.49                   | 318                      | GRA               |
| ARM_E15               | 36.43                   | -98.28                   | 418                      | GRA               |
| ARM_E16               | 36.061                  | -99.134                  | 602                      | GRA               |
| ARM_E18               | 35.687                  | -95.86                   | 217                      | GRA               |
| ARM_E19               | 35.56                   | -98.02                   | 421                      | GRA               |
| ARM_E20               | 35.56                   | -96.99                   | 309                      | GRA               |
| ARM_E21               | 35.615                  | -96.065                  | 240                      | DBF               |
| ARM_E22               | 35.35                   | -98.98                   | 465                      | GRA               |
| ARM_E24               | 34.883                  | -98.205                  | 409                      | CRO               |
| ARM_E25               | 35.25                   | -96.74                   | 277                      | GRA               |
| ARM_E27               | 35.27                   | -96.74                   | 300                      | GRA               |
| ARM_E31               | 37.151                  | -98.362                  | 412                      | GRA               |
| ARM_E32               | 36.819                  | -97.82                   | 328                      | GRA               |
| ARM_E33               | 36.926                  | -97.082                  | 357                      | GRA               |
| ARM_E34               | 37.069                  | -96.761                  | 417                      | GRA               |
| ARM_E35               | 35.862                  | -97.069                  | 294                      | GRA               |
| ARM_E36               | 36.117                  | -97.511                  | 337                      | GRA               |
| ARM_E37               | 36.311                  | -97.928                  | 379                      | CRO               |
| ARM_E38               | 35.88                   | -98.173                  | 371                      | CRO               |
| ARM_E39               | 36.37354                | -97.069                  | 279                      | CRO               |

---

|                |           |           |       |     |
|----------------|-----------|-----------|-------|-----|
| ARM_E40        | 36.3199   | -96.7652  | 247   | GRA |
| BSRN_BON       | 40.0667   | -88.3667  | 213   | CRO |
| BSRN_BOS       | 40.125    | -105.237  | 1689  | GRA |
| BSRN_BOU       | 40.05     | -105.007  | 1577  | CRO |
| BSRN_DAR       | -12.425   | 130.891   | 30    | GRA |
| BSRN_DRA       | 36.626    | -116.018  | 1007  | BSV |
| BSRN_E13       | 36.605    | -97.485   | 318   | GRA |
| BSRN_FPE       | 48.3167   | -105.1    | 634   | GRA |
| BSRN_GCR       | 34.25     | -89.87    | 98    | GRA |
| BSRN_GOB       | -23.5614  | 15.042    | 407   | BSV |
| BSRN_IZA       | 28.3093   | -16.4993  | 2373  | BSV |
| BSRN_NYA       | 78.925    | 11.93     | 11    | TUN |
| BSRN_PAY       | 46.815    | 6.944     | 491   | CRO |
| BSRN_PSU       | 40.72     | -77.9333  | 376   | CRO |
| BSRN_SOV       | 24.91     | 46.41     | 650   | BSV |
| BSRN_SXF       | 43.73     | -96.62    | 473   | GRA |
| BSRN_SYO       | -69.005   | 39.589    | 18    | ICE |
| BSRN_TAT       | 36.05     | 140.1333  | 25    | GRA |
| BSRN_TIK       | 71.5862   | 128.9188  | 48    | TUN |
| BSRN_TOR       | 58.254    | 26.462    | 70    | GRA |
| CD04_KM83      | -3.01806  | -54.96889 | 100   | MF  |
| CD32_RON_FNS   | -10.76167 | -62.35833 | 288   | GRA |
| CD32_RON_RJA   | -10.07833 | -61.9331  | 200   | MF  |
| CD32_SP_PDG    | -21.61917 | -47.63278 | 659   | SAV |
| CD32_STM_K34   | -2.608333 | -60.20833 | 67    | MF  |
| CD32_STM_K77   | -3.012    | -54.537   | 41    | CRO |
| CD32_STR_K83   | -3.05     | -54.93333 | 95    | MF  |
| CD32_TOC_BAN   | -9.821139 | -50.14869 | 229   | MF  |
| CEOPInt_ANBrw  | 71.32     | -156.61   | 8     | WET |
| CEOPInt_ATDar  | -12.425   | 130.892   | 29.9  | OSH |
| CEOPInt_ATMan  | -2.06     | 147.43    | 4     | GRA |
| CEOPInt_ATNau  | -0.521    | 166.916   | 7.1   | DBF |
| CEOPInt_LinFK  | 52.17     | 14.12     | 73    | GRA |
| CEOPInt_LinF   | 52.18     | 13.95     | 49.1  | DBF |
| CEOPInt_SodOSA | 67.36667  | 26.629056 | 193.3 | ENF |
| CEOP_AR        | 38.043333 | 100.46467 | 3033  | GRA |
| CEOP_DS        | 44.088889 | 113.57417 | 970   | GRA |
| CEOP_DX        | 35.556367 | 104.59383 | 1896  | CRO |
| CEOP_JZ        | 41.1841   | 121.20167 | 22    | CRO |
| CEOP_MQ        | 33.8872   | 102.1407  | 3423  | WET |
| CEOP_MY        | 40.630833 | 117.32333 | 350   | CRO |
| CEOP_NM        | 42.928833 | 120.69783 | 361   | GRA |
| CEOP_SPT       | 37.32     | 105.11    | 1227  | BSV |
| CEOP_TYCRO     | 44.566667 | 122.88333 | 184   | CRO |

---

---

|                |           |           |        |     |
|----------------|-----------|-----------|--------|-----|
| CEOP_TYGRA     | 44.566667 | 122.88333 | 184    | GRA |
| CEOP_YK        | 38.86     | 100.41    | 1519   | CRO |
| CEOP_YZ        | 35.95     | 104.13333 | 1965   | GRA |
| CERN_FK        | 44.28     | 87.92     | 482    | GRA |
| CF_DZ          | 19.5464   | 109.475   | 114    | CRO |
| CF_PD          | 26.3675   | 105.7522  | 1158   | EBF |
| EOL-CAMP_ANNI  | 31.25442  | 92.17241  | 4480   | BSV |
| EOL-CAMP_BJ    | 31.36866  | 91.89871  | 4509.2 | BSV |
| EOL-CAMP_D105  | 33.0643   | 91.9425   | 5038.6 | BSV |
| EOL-CAMP_FOR   | 46.3989   | 10.5903   | 2669   | BSV |
| EOL-CAMP_Gaize | 32.3      | 84.05     | 4416   | BSV |
| EOL-CAMP_LAM   | 18.4      | 99.47     | 241    | EBF |
| EOL-CAMP_PYR   | 27.9591   | 86.8132   | 5035   | BSV |
| EOL-CAMP_TYGRA | 44.416    | 122.867   | 184    | GRA |
| EOL-CRD_C2     | 64.89     | -163.64   | 110    | OSH |
| EOL-KRD_K2     | 65.43     | -164.64   | 59     | BSV |
| EOL-PAN        | -19.5597  | -57.5833  | 160    | SAV |
| EOL-SAN        | -3.02     | -54.97    | 130    | EBF |
| FGI_MET0002    | 67.361866 | 26.637728 | 179    | ENF |
| FGI_MET0005    | 67.361866 | 26.637728 | 179    | ENF |
| FR_Mau         | 43.0519   | -1.1256   | 384    | GRA |
| FxMt_BKS       | -0.861389 | 117.04472 | 20     | EBF |
| FxMt_BNS       | 21.95     | 101.02    | 20     | EBF |
| FxMt_CLM       | 24.583333 | 121.4     | 1400   | ENF |
| FxMt_GCK       | 37.748333 | 127.16222 | 132    | DNF |
| FxMt_KBU       | 47.213972 | 108.73733 | 1235   | GRA |
| FxMt_LSH       | 45.278611 | 127.57839 | 340    | DNF |
| FxMt_MBF       | 44.384167 | 142.31861 | 585    | DBF |
| FxMt_MKL       | 14.576278 | 98.843889 | 231    | MF  |
| FxMt_MMF       | 44.321944 | 142.26139 | 340    | MF  |
| FxMt_MSE       | 36.053972 | 140.02692 | 13     | CRO |
| FxMt_PSO       | 2.96667   | 102.3     | 134    | EBF |
| FxMt_QHB       | 37.6      | 101.33333 | 3250   | GRA |
| FxMt_QYZ       | 26.7333   | 115.06667 | 100    | WSA |
| FxMt_SKR       | 14.492361 | 101.91631 | 543    | EBF |
| FxMt_SKT       | 48.351861 | 108.65433 | 1630   | DNF |
| FxMt_SMF       | 35.25     | 137.06667 | 205    | MF  |
| FxMt_TKY       | 36.146167 | 137.42311 | 1420   | DBF |
| FxMt_TMK       | 42.736972 | 141.51864 | 140    | DNF |
| FxMt_TSE       | 45.05     | 142.1     | 70     | MF  |
| FxMt_YCS       | 36.5      | 116.34    | 28     | CRO |
| FxMt_YPF       | 62.241389 | 129.65056 | 220    | ENF |
| GCNET-01       | 69.564722 | -49.33083 | 1176   | ICE |
| GCNET-02       | 69.564722 | -46.99667 | 2022   | ICE |

---

---

|             |           |           |         |     |
|-------------|-----------|-----------|---------|-----|
| GCNET-03    | 73.841389 | -49.50694 | 2334    | ICE |
| GCNET-04    | 77.137778 | -61.04    | 1869    | ICE |
| GCNET-05    | 78.526667 | -56.83056 | 1995    | ICE |
| GCNET-06    | 72.579444 | -38.50528 | 3199    | ICE |
| GCNET-07    | 78.016389 | -33.98333 | 2052    | ICE |
| GCNET-08    | 66.480556 | -46.28306 | 2099    | ICE |
| GCNET-09    | 69.495    | -49.70389 | 932     | ICE |
| GCNET-10    | 65.999722 | -44.50017 | 2467    | ICE |
| GCNET-11    | 63.14889  | -44.81717 | 2901    | ICE |
| GCNET-12    | 75.000556 | -29.99722 | 2614    | ICE |
| GCNET-13    | 69.913333 | -46.98962 | 1990    | ICE |
| GCNET-15    | 66.475    | -42.49861 | 2373    | ICE |
| GCNET-16    | 69.699444 | -33.00058 | 2579    | ICE |
| GCNET-17    | 69.414722 | -50.09278 | 507     | ICE |
| GCNET-20    | 67.135833 | -47.29222 | 1798    | ICE |
| GCNET-21    | 80.683611 | -60.29306 | 37      | ICE |
| GM_Amdo     | 32.241133 | 91.625117 | 4700    | GRA |
| GM_KogMa    | 18.8126   | 98.9002   | 1268    | ENF |
| HAWS01      | 38.89322  | 100.35813 | 1552.75 | CRO |
| HAWS02      | 38.88695  | 100.35406 | 1559.09 | CRO |
| HAWS03      | 38.89053  | 100.37634 | 1543.05 | CRO |
| HAWS04      | 38.87752  | 100.35753 | 1561.87 | BSV |
| HAWS05      | 38.87574  | 100.35068 | 1567.65 | CRO |
| HAWS06      | 38.87116  | 100.3597  | 1562.97 | CRO |
| HAWS07      | 38.87676  | 100.36521 | 1556.39 | CRO |
| HAWS08      | 38.87254  | 100.37649 | 1550.06 | CRO |
| HAWS09      | 38.87239  | 100.38646 | 1543.34 | CRO |
| HAWS10      | 38.87567  | 100.39572 | 1534.73 | CRO |
| HAWS11      | 38.86991  | 100.34197 | 1575.65 | CRO |
| HAWS12      | 38.86515  | 100.36631 | 1559.25 | CRO |
| HAWS13      | 38.86074  | 100.37852 | 1550.73 | CRO |
| HAWS14      | 38.85867  | 100.3531  | 1570.23 | CRO |
| HAWS17      | 38.8451   | 100.36972 | 1559.63 | MF  |
| HAWS18      | 38.91496  | 100.3042  | 1562    | BSV |
| HAWS19      | 38.78917  | 100.4933  | 1594    | BSV |
| HAWS21      | 38.97514  | 100.4464  | 1460    | WET |
| IMAU-S10    | 67.0005   | -47.0167  | 1850    | ICE |
| IMAU-S5     | 67.0833   | 50.1      | 500     | ICE |
| IMAU-S6     | 67.06667  | 49.383333 | 1000    | ICE |
| IMAU-S9     | 67.05     | 48.216667 | 1500    | ICE |
| Lath_AT-Neu | 47.11667  | 11.3175   | 970     | GRA |
| Lath_AU-ASM | -22.283   | 133.249   | 608     | ENF |
| Lath_AU-Cpr | -34.0021  | 140.5891  | 63      | SAV |
| Lath_AU-Fog | -12.5425  | 131.307   | 4       | WET |

---

---

|             |           |           |      |     |
|-------------|-----------|-----------|------|-----|
| Lath_AU-Gin | -31.3764  | 115.7138  | 50   | WSA |
| Lath_AU-How | -12.4943  | 131.152   | 40   | WSA |
| Lath_AU-Rig | -36.6499  | 145.5759  | 151  | GRA |
| Lath_AU-Wac | -37.429   | 145.187   | 545  | MF  |
| Lath_AU-Whr | -36.6732  | 145.0294  | 151  | EBF |
| Lath_AU-Wom | -37.4222  | 144.0944  | 705  | EBF |
| Lath_BE-Bra | 51.3092   | 4.52056   | 16   | MF  |
| Lath_BE-Lon | 50.5522   | 4.74494   | 167  | CRO |
| Lath_BE-Vie | 50.3055   | 5.99683   | 450  | MF  |
| Lath_BR-Cax | -1.71972  | -51.459   | 50   | EBF |
| Lath_BR-Ma2 | -2.6091   | -60.2093  | 120  | EBF |
| Lath_BR-Sa3 | -3.01803  | -54.9714  | 100  | EBF |
| Lath_BR-Sp1 | -21.6195  | -47.6499  | 690  | WSA |
| Lath_BW-Ghg | -21.51    | 21.74     | 1162 | SAV |
| Lath_BW-Ma1 | -19.9155  | 23.5605   | 950  | WSA |
| Lath_CA-ARB | 52.694999 | -83.94523 | 90   | WET |
| Lath_CA-ARF | 52.70078  | -83.95505 | 88   | WET |
| Lath_CA-Ca1 | 49.8672   | -125.334  | 300  | ENF |
| Lath_CA-Ca2 | 49.8705   | -125.291  | 300  | ENF |
| Lath_CA-Ca3 | 49.5346   | -124.9    | 300  | ENF |
| Lath_CA-Gro | 48.2167   | -82.1556  | 355  | MF  |
| Lath_CA-Let | 49.7093   | -112.94   | 960  | GRA |
| Lath_CA-Man | 55.8796   | -98.4808  | 259  | ENF |
| Lath_CA-Mer | 45.4094   | -75.5186  | 70   | WET |
| Lath_CA-NS1 | 55.8792   | -98.4839  | 260  | ENF |
| Lath_CA-NS2 | 55.9058   | -98.5247  | 260  | ENF |
| Lath_CA-NS3 | 55.9117   | -98.3822  | 260  | ENF |
| Lath_CA-NS4 | 55.9117   | -98.3822  | 260  | ENF |
| Lath_CA-NS5 | 55.8631   | -98.485   | 260  | ENF |
| Lath_CA-NS6 | 55.9167   | -98.9644  | 244  | OSH |
| Lath_CA-NS7 | 56.6358   | -99.9483  | 273  | OSH |
| Lath_CA-Oas | 53.6289   | -106.198  | 530  | DBF |
| Lath_CA-Obs | 53.9872   | -105.118  | 629  | ENF |
| Lath_CA-Ojp | 53.9163   | -104.692  | 579  | ENF |
| Lath_CA-Qcu | 49.2671   | -74.0365  | 392  | ENF |
| Lath_CA-Qfo | 49.6925   | -74.3421  | 382  | ENF |
| Lath_CA-SCB | 61.3089   | -121.2984 | 280  | WET |
| Lath_CA-SF1 | 54.485    | -105.818  | 536  | ENF |
| Lath_CA-SF2 | 54.2539   | -105.878  | 520  | ENF |
| Lath_CA-SF3 | 54.0916   | -106.005  | 540  | OSH |
| Lath_CA-SJ1 | 53.908    | -104.656  | 580  | ENF |
| Lath_CA-SJ2 | 53.945    | -104.649  | 580  | ENF |
| Lath_CA-SJ3 | 53.8758   | -104.645  | 580  | ENF |
| Lath_CA-TP1 | 42.6609   | -80.5595  | 265  | ENF |

---

---

|             |           |           |      |     |
|-------------|-----------|-----------|------|-----|
| Lath_CA-TP2 | 42.7744   | -80.4588  | 212  | ENF |
| Lath_CA-TP3 | 42.7068   | -80.3483  | 184  | ENF |
| Lath_CA-TP4 | 42.7098   | -80.3574  | 184  | ENF |
| Lath_CA-TPD | 42.635328 | -80.55773 | 260  | DBF |
| Lath_CA-WP1 | 54.9538   | -112.467  | 540  | WET |
| Lath_CA-WP2 | 55.5375   | -112.334  | 540  | WET |
| Lath_CA-WP3 | 54.47     | -113.32   | 540  | WET |
| Lath_CG-Tch | -4.28917  | 11.6564   | 87   | OSH |
| Lath_CH-Cha | 47.21022  | 8.41044   | 393  | GRA |
| Lath_CH-Dav | 46.81533  | 9.85591   | 1639 | ENF |
| Lath_CH-Oe1 | 47.2856   | 7.73214   | 450  | GRA |
| Lath_CH-Oe2 | 47.2863   | 7.73433   | 452  | CRO |
| Lath_CN-Anh | 33        | 117       | 23   | DBF |
| Lath_CN-Bed | 39.5306   | 116.252   | 30   | EBF |
| Lath_CN-Cha | 42.4025   | 128.096   | 761  | MF  |
| Lath_CN-Cng | 44.5934   | 123.5092  | 141  | GRA |
| Lath_CN-Do1 | 31.5167   | 121.961   | 2    | WET |
| Lath_CN-Do3 | 31.5169   | 121.972   | 2    | WET |
| Lath_CN-Du1 | 42.0456   | 116.671   | 1350 | CRO |
| Lath_CN-Du2 | 42.0467   | 116.284   | 1350 | GRA |
| Lath_CN-Ha2 | 37.6086   | 101.3269  | 3203 | WET |
| Lath_CN-HaM | 37.37     | 101.18    | 3250 | GRA |
| Lath_CN-Ku1 | 40.5383   | 108.694   | 1020 | EBF |
| Lath_CN-Ku2 | 40.3808   | 108.549   | 1160 | OSH |
| Lath_CN-Xfs | 44.13417  | 116.3286  | 1121 | GRA |
| Lath_CN-Xi1 | 43.54583  | 116.6778  | 1270 | GRA |
| Lath_CN-Xi2 | 43.5544   | 116.671   | 1203 | GRA |
| Lath_CZ-BK1 | 49.5026   | 18.5384   | 908  | ENF |
| Lath_CZ-BK2 | 49.4953   | 18.5447   | 855  | GRA |
| Lath_CZ-wet | 49.025    | 14.772    | 420  | WET |
| Lath_DE-Akm | 53.86617  | 13.68342  | -1   | WET |
| Lath_DE-Geb | 51.1001   | 10.9143   | 162  | CRO |
| Lath_DE-Gri | 50.9495   | 13.5125   | 385  | GRA |
| Lath_DE-Hai | 51.0793   | 10.452    | 430  | DBF |
| Lath_DE-Har | 47.9344   | 7.601     | 201  | ENF |
| Lath_DE-Kli | 50.8929   | 13.5225   | 480  | CRO |
| Lath_DE-Lkb | 49.09962  | 13.30467  | 1308 | ENF |
| Lath_DE-Lnf | 51.32822  | 10.3678   | 451  | DBF |
| Lath_DE-Meh | 51.2753   | 10.6555   | 286  | GRA |
| Lath_DE-Spw | 51.89225  | 14.03369  | 61   | WET |
| Lath_DE-Tha | 50.9636   | 13.5669   | 380  | ENF |
| Lath_DE-Wet | 50.4535   | 11.4575   | 785  | ENF |
| Lath_DK-Fou | 56.4842   | 9.58722   | 51   | CRO |
| Lath_DK-Lva | 55.6833   | 12.0833   | 15   | GRA |

---

---

|             |          |           |      |     |
|-------------|----------|-----------|------|-----|
| Lath_DK-Nuf | 64.13083 | -51.38611 | 50   | WET |
| Lath_DK-Ris | 55.5303  | 12.0972   | 10   | CRO |
| Lath_DK-Sor | 55.4869  | 11.6458   | 40   | DBF |
| Lath_ES-ES1 | 39.346   | -0.31881  | 10   | ENF |
| Lath_ES-ES2 | 39.2755  | -0.31522  | 10   | CRO |
| Lath_ES-LJu | 36.9282  | -2.75047  | 1600 | OSH |
| Lath_ES-LMa | 39.9415  | -5.77336  | 260  | SAV |
| Lath_ES-VDA | 42.1522  | 1.4485    | 1770 | GRA |
| Lath_FI-Hyy | 61.8474  | 24.2948   | 181  | ENF |
| Lath_FI-Kaa | 69.1407  | 27.295    | 155  | WET |
| Lath_FI-Sii | 61.833   | 24.193    | 170  | GRA |
| Lath_FI-Sod | 67.3619  | 26.6378   | 180  | ENF |
| Lath_FR-Aur | 43.5494  | 1.10778   | 240  | CRO |
| Lath_FR-Fon | 48.4763  | 2.78015   | 90   | DBF |
| Lath_FR-Gri | 48.844   | 1.95243   | 125  | CRO |
| Lath_FR-Hes | 48.6742  | 7.06462   | 300  | DBF |
| Lath_FR-LBr | 44.7171  | -0.7693   | 61   | ENF |
| Lath_FR-Lam | 43.4933  | 1.23722   | 180  | CRO |
| Lath_FR-Lq1 | 45.6441  | 2.73703   | 1040 | GRA |
| Lath_FR-Lq2 | 45.6392  | 2.73703   | 1040 | GRA |
| Lath_FR-Pue | 43.7414  | 3.59583   | 270  | EBF |
| Lath_GF-Guy | 5.2777   | -52.9288  | 35   | EBF |
| Lath_GH-Ank | 5.26854  | -2.69421  | 154  | EBF |
| Lath_HU-Bug | 46.6911  | 19.6013   | 140  | GRA |
| Lath_HU-Mat | 47.8469  | 19.726    | 350  | GRA |
| Lath_ID-Pag | 2.345    | 114.036   | 30   | EBF |
| Lath_IE-Ca1 | 52.8588  | -6.91814  | 50   | CRO |
| Lath_IE-Dri | 51.9867  | -8.75181  | 187  | GRA |
| Lath_IL-Yat | 31.345   | 35.0515   | 650  | ENF |
| Lath_IT-Amp | 41.9041  | 13.6052   | 833  | GRA |
| Lath_IT-BCi | 40.5238  | 14.9574   | 20   | CRO |
| Lath_IT-Be2 | 46.0031  | 13.0257   | 67   | GRA |
| Lath_IT-Bon | 39.4778  | 16.5347   | 1170 | ENF |
| Lath_IT-Cas | 45.06285 | 8.668539  | 90   | CRO |
| Lath_IT-Col | 41.8494  | 13.5881   | 1550 | DBF |
| Lath_IT-Cpz | 41.7052  | 12.3761   | 68   | EBF |
| Lath_IT-LMa | 45.5813  | 7.15463   | 350  | GRA |
| Lath_IT-Lav | 45.9553  | 11.2812   | 1353 | ENF |
| Lath_IT-Lec | 43.3046  | 11.2706   | 314  | EBF |
| Lath_IT-MBo | 46.0156  | 11.0467   | 1550 | GRA |
| Lath_IT-Mal | 46.1167  | 11.7028   | 1730 | GRA |
| Lath_IT-Noe | 40.606   | 8.151     | 28   | CSH |
| Lath_IT-Non | 44.6898  | 11.0887   | 25   | DBF |
| Lath_IT-PT1 | 45.2009  | 9.06104   | 60   | DBF |

---



---

|             |          |          |      |     |
|-------------|----------|----------|------|-----|
| Lath_IT-Ren | 46.5878  | 11.4347  | 11   | ENF |
| Lath_IT-Ro1 | 42.4081  | 11.93    | 235  | DBF |
| Lath_IT-Ro2 | 42.3903  | 11.9209  | 224  | DBF |
| Lath_IT-SRo | 43.72786 | 10.28444 | 4    | ENF |
| Lath_IT-Tor | 45.84444 | 7.57806  | 2160 | GRA |
| Lath_IT-Vig | 45.31667 | 8.85     | 106  | DBF |
| Lath_JP-Mas | 36.05397 | 140.0269 | 20   | CRO |
| Lath_JP-Tef | 45.05634 | 142.1062 | 105  | MF  |
| Lath_JP-Tom | 42.7395  | 141.5149 | 477  | MF  |
| Lath_KR-Hnm | 34.55    | 126.57   | 7    | CRO |
| Lath_KR-Kw1 | 37.7486  | 127.163  | 330  | MF  |
| Lath_NL-Ca1 | 52.0031  | 4.8055   | 0.7  | GRA |
| Lath_NL-Haa | 52.0031  | 4.8055   | 1    | GRA |
| Lath_NL-Hor | 52.0289  | 5.0675   | 1    | GRA |
| Lath_NL-Lan | 51.9536  | 4.9029   | 1    | CRO |
| Lath_NL-Loo | 52.16658 | 5.74396  | 25   | ENF |
| Lath_NL-Lut | 53.3989  | 6.356    | 1    | CRO |
| Lath_NL-Mol | 52.775   | 4.899    | 1    | CRO |
| Lath_NO-Adv | 78.186   | 15.923   | 17   | WET |
| Lath_PL-wet | 52.7622  | 16.3094  | 54   | WET |
| Lath_PT-Esp | 38.6394  | -8.6018  | 95   | EBF |
| Lath_PT-Mi1 | 38.5407  | -8.0004  | 250  | EBF |
| Lath_PT-Mi2 | 38.4765  | -8.02455 | 190  | GRA |
| Lath_RU-Che | 68.6147  | 161.339  | 3    | WET |
| Lath_RU-Cok | 70.6167  | 147.883  | 15   | OSH |
| Lath_RU-Fyo | 56.46167 | 32.92389 | 260  | ENF |
| Lath_RU-Zot | 60.8008  | 89.3508  | 90   | ENF |
| Lath_SE-Abi | 68.36239 | 18.79475 | 345  | DBF |
| Lath_SE-Deg | 64.1833  | 19.55    | 270  | WET |
| Lath_SE-Fla | 64.1128  | 19.4569  | 226  | ENF |
| Lath_SE-Nor | 60.0865  | 17.4795  | 43   | ENF |
| Lath_SE-Sk1 | 60.125   | 17.9181  | 42   | ENF |
| Lath_SE-Sk2 | 60.12967 | 17.84006 | 55   | ENF |
| Lath_SK-Tat | 49.1208  | 20.1635  | 1050 | ENF |
| Lath_UK-AMo | 55.7917  | -3.23889 | 270  | WET |
| Lath_UK-EBu | 55.866   | -3.20578 | 190  | GRA |
| Lath_UK-ESa | 55.90694 | -2.85861 | 97   | CRO |
| Lath_UK-Gri | 56.60722 | -3.79806 | 340  | ENF |
| Lath_UK-Ham | 51.15353 | -0.8583  | 80   | DBF |
| Lath_UK-Her | 51.7838  | -0.47608 | 140  | CRO |
| Lath_UK-PL3 | 51.45    | -1.26667 | 115  | DBF |
| Lath_UK-Tad | 51.2071  | -2.82864 | 3    | GRA |
| Lath_US-AR1 | 36.4267  | -99.42   | 611  | GRA |
| Lath_US-ARM | 36.6058  | -97.4888 | 314  | CRO |

---

---

|             |           |           |       |     |
|-------------|-----------|-----------|-------|-----|
| Lath_US-ARb | 35.5497   | -98.0402  | 424   | GRA |
| Lath_US-ARc | 35.54649  | -98.04    | 424   | GRA |
| Lath_US-An2 | 68.95     | -150.21   | 600   | OSH |
| Lath_US-An3 | 68.93     | -150.27   | 600   | OSH |
| Lath_US-Atq | 70.4696   | -157.409  | 15    | WET |
| Lath_US-Aud | 31.5907   | -110.51   | 1469  | GRA |
| Lath_US-Bar | 44.0646   | -71.28808 | 272   | DBF |
| Lath_US-Bi1 | 38.1022   | -121.5042 | -3.92 | CRO |
| Lath_US-Bkg | 44.3453   | -96.8362  | 510   | GRA |
| Lath_US-Blk | 44.158    | -103.65   | 1718  | ENF |
| Lath_US-Blo | 38.8952   | -120.6328 | 1315  | ENF |
| Lath_US-Bn1 | 63.9198   | -145.378  | 518   | ENF |
| Lath_US-Bn2 | 63.9198   | -145.378  | 410   | DBF |
| Lath_US-Bn3 | 63.9227   | -145.744  | 469   | OSH |
| Lath_US-Bo1 | 40.0062   | -88.2904  | 219   | CRO |
| Lath_US-Br1 | 41.9749   | -93.6906  | 313   | CRO |
| Lath_US-Br3 | 41.97472  | -93.69357 | 313   | CRO |
| Lath_US-Brw | 71.3225   | -156.6259 | 1     | WET |
| Lath_US-CPk | 41.067963 | -106.1187 | 2750  | ENF |
| Lath_US-CaV | 39.0633   | -79.4208  | 994   | GRA |
| Lath_US-ChR | 35.93109  | -84.33242 | 286   | DBF |
| Lath_US-FPe | 48.3077   | -105.1019 | 634   | GRA |
| Lath_US-FR2 | 29.9495   | -97.9962  | 272   | WSA |
| Lath_US-FR3 | 29.94     | -97.99    | 232   | CSH |
| Lath_US-Fmf | 35.1426   | -111.7273 | 2160  | ENF |
| Lath_US-Fuf | 35.089    | -111.762  | 2180  | ENF |
| Lath_US-Fwf | 35.4454   | -111.7718 | 2270  | GRA |
| Lath_US-GBT | 41.36579  | -106.2397 | 3191  | ENF |
| Lath_US-GLE | 41.36653  | -106.2399 | 3197  | ENF |
| Lath_US-Goo | 34.2547   | -89.8735  | 87    | GRA |
| Lath_US-Ha1 | 42.5378   | -72.1715  | 340   | DBF |
| Lath_US-Ho1 | 45.2041   | -68.7402  | 60    | ENF |
| Lath_US-Ho2 | 45.2091   | -68.747   | 91    | ENF |
| Lath_US-Ho3 | 45.2072   | -68.725   | 61    | ENF |
| Lath_US-IB1 | 41.8593   | -88.2227  | 225   | CRO |
| Lath_US-IB2 | 41.8406   | -88.241   | 225   | GRA |
| Lath_US-Ivo | 68.4865   | -155.75   | 579   | WET |
| Lath_US-KFS | 39.0561   | -95.1907  | 310   | GRA |
| Lath_US-KS2 | 28.6086   | -80.6715  | 3     | CSH |
| Lath_US-KUT | 44.994989 | -93.18628 | 301   | GRA |
| Lath_US-Los | 46.0827   | -89.9792  | 480   | CSH |
| Lath_US-MMS | 39.3231   | -86.4131  | 275   | DBF |
| Lath_US-MOz | 38.7441   | -92.2     | 220   | DBF |
| Lath_US-MRf | 44.64649  | -123.5515 | 263   | ENF |

---

---

|             |           |           |       |     |
|-------------|-----------|-----------|-------|-----|
| Lath_US-Me2 | 44.4523   | -121.5574 | 1253  | ENF |
| Lath_US-Me3 | 44.3154   | -121.6078 | 1005  | ENF |
| Lath_US-Me6 | 44.323284 | -121.6078 | 998   | ENF |
| Lath_US-Mpj | 34.4385   | -106.2377 | 2196  | WSA |
| Lath_US-NC1 | 35.8115   | -76.7115  | 5     | OSH |
| Lath_US-NC2 | 35.8031   | -76.6679  | 12    | ENF |
| Lath_US-NC3 | 35.799    | -76.656   | 5     | ENF |
| Lath_US-NC4 | 35.7879   | -75.9038  | 1     | WET |
| Lath_US-NGB | 71.280044 | -156.6092 | 5.273 | ICE |
| Lath_US-NR1 | 40.0329   | -105.546  | 3050  | ENF |
| Lath_US-Ne1 | 41.1651   | -96.4766  | 361   | CRO |
| Lath_US-Ne2 | 41.1649   | -96.4701  | 362   | CRO |
| Lath_US-Ne3 | 41.1797   | -96.4397  | 363   | CRO |
| Lath_US-Oho | 41.5545   | -83.8438  | 230   | DBF |
| Lath_US-PFa | 45.9459   | -90.2723  | 470   | MF  |
| Lath_US-Prr | 65.12367  | -147.4876 | 210   | ENF |
| Lath_US-RO1 | 44.7143   | -93.0898  | 290   | CRO |
| Lath_US-RO4 | 44.6781   | -93.0723  | 274   | GRA |
| Lath_US-SO2 | 33.3739   | -116.6229 | 1394  | CSH |
| Lath_US-SO3 | 33.3772   | -116.6227 | 1429  | CSH |
| Lath_US-SO4 | 33.3844   | -116.6403 | 1429  | CSH |
| Lath_US-SP1 | 29.7381   | -82.2188  | 50    | ENF |
| Lath_US-SP2 | 29.7648   | -82.2448  | 50    | ENF |
| Lath_US-SP3 | 29.7548   | -82.1633  | 50    | ENF |
| Lath_US-SRC | 31.9083   | -110.8395 | 991   | OSH |
| Lath_US-SRG | 31.789379 | -110.8277 | 1291  | GRA |
| Lath_US-SRM | 31.8214   | -110.866  | 1120  | WSA |
| Lath_US-Seg | 34.3623   | -106.702  | 1596  | GRA |
| Lath_US-Ses | 34.3349   | -106.7442 | 1604  | OSH |
| Lath_US-Skr | 25.362933 | -81.07758 | 0     | EBF |
| Lath_US-Slt | 39.9138   | -74.596   | 30    | DBF |
| Lath_US-Srr | 38.200556 | -122.0264 | 8     | WET |
| Lath_US-Syv | 46.242    | -89.3477  | 540   | MF  |
| Lath_US-Ton | 38.4316   | -120.966  | 177   | WSA |
| Lath_US-Tw1 | 38.1074   | -121.6469 | -9    | WET |
| Lath_US-UMB | 45.5598   | -84.7138  | 234   | DBF |
| Lath_US-UMd | 45.5625   | -84.6975  | 239   | DBF |
| Lath_US-Uaf | 64.86627  | -147.8555 | 155   | ENF |
| Lath_US-Var | 38.4133   | -120.9507 | 129   | GRA |
| Lath_US-WBW | 35.9588   | -84.2874  | 387   | DBF |
| Lath_US-WCr | 45.8059   | -90.0799  | 520   | DBF |
| Lath_US-Whs | 31.7438   | -110.0522 | 1370  | OSH |
| Lath_US-Wi7 | 46.6491   | -91.0693  | 349   | OSH |
| Lath_US-Wi9 | 46.6188   | -91.0814  | 349   | ENF |

---

|                                     |           |           |      |     |
|-------------------------------------|-----------|-----------|------|-----|
| Lath_US-Wjs                         | 34.425489 | -105.8615 | 1931 | SAV |
| Lath_US-Wkg                         | 31.7365   | -109.942  | 1531 | GRA |
| Lath_US-Wrc                         | 45.8205   | -121.952  | 371  | ENF |
| Lath_VU-Coc                         | -15.4427  | 167.192   | 80   | EBF |
| Lath_ZA-Kru                         | -25.0197  | 31.4969   | 359  | SAV |
| Lath_ZM-Mon                         | -15.43778 | 23.25278  | 1053 | DBF |
| PM-KAN_L                            | 67.0955   | -49.9513  | 670  | ICE |
| PM-KAN_M                            | 67.067    | -48.8355  | 1270 | ICE |
| PM-KPC_L                            | 79.9108   | -24.0828  | 370  | ICE |
| PM-KPC_U                            | 79.8347   | -25.1662  | 870  | ICE |
| PM-MIT                              | 65.6922   | -37.828   | 440  | ICE |
| PM-NUK_L                            | 64.4822   | -49.5358  | 530  | ICE |
| PM-NUK_N                            | 64.1623   | -51.3587  | 710  | ICE |
| PM-NUK_U                            | 64.5108   | -49.2692  | 1120 | ICE |
| PM-QAS_L                            | 61.0308   | -46.8493  | 280  | ICE |
| PM-QAS_U                            | 61.1753   | -46.8195  | 900  | ICE |
| PM-SCO_L                            | 72.223    | -26.8182  | 460  | ICE |
| PM-SCO_U                            | 72.3933   | -27.2333  | 970  | ICE |
| PM-TAS_L                            | 61.0308   | -46.8493  | 280  | ICE |
| PM-THU_L                            | 76.3998   | -68.2665  | 570  | ICE |
| PM-THU_U                            | 76.4197   | -68.1463  | 760  | ICE |
| PM-UPE_L                            | 72.8932   | -54.2955  | 220  | ICE |
| PM-UPE_U                            | 72.8878   | -53.5783  | 940  | ICE |
| SFR_Skukuza                         | -25.02    | 31.484444 | 346  | SAV |
| SF_BND                              | 40.05     | -88.37    | 230  | CRO |
| SF_DRA                              | 36.63     | -116.02   | 1007 | BSV |
| SF_FPK                              | 48.31     | -105.1    | 634  | GRA |
| SF_GCM                              | 34.25     | -89.87    | 98   | GRA |
| SF_PSU                              | 40.72     | -77.93    | 376  | CRO |
| SF_SXF                              | 43.73     | -96.62    | 473  | CRO |
| SF_TBL                              | 40.13     | -105.24   | 1689 | GRA |
| stKOB                               | 64.116667 | -51.35    | 968  | TUN |
| stZAC                               | 74.466667 | -21       | 822  | TUN |
| <b>Independent validation sites</b> |           |           |      |     |
| ARM_E06                             | 37.842    | -97.02    | 409  | CRO |
| ARM_E41                             | 36.87956  | -97.0865  | 340  | CRO |
| BSRN_ALE                            | 82.49     | -62.42    | 127  | ICE |
| BSRN_GVN                            | -70.65    | -8.25     | 42   | ICE |
| CEOPInt_OR                          | 35.9583   | -84.2916  | 326  | DBF |
| CEOP_DYK                            | 38.533667 | 100.25017 | 2853 | GRA |
| CEOP_GT                             | 36.515    | 115.12744 | 42   | CRO |
| CEOP_QY                             | 35.59     | 107.54    | 1095 | GRA |
| CEOP_ZY                             | 39.085542 | 100.27924 | 1483 | GRA |
| CF_HB                               | 37.6099   | 101.3224  | 3205 | WET |

---

|             |           |           |         |     |
|-------------|-----------|-----------|---------|-----|
| CNAADC_ZS   | -69.3735  | 76.3706   | 14.9    | ICE |
| EOL-CRD_C1  | 64.84     | -163.7    | 40      | OSH |
| EOL-CRD_C3  | 64.75     | -163.89   | 171     | TUN |
| EOL-KRD_K1  | 65.44     | -164.57   | 258     | BSV |
| EOL-KRD_K3  | 65.45     | -164.64   | 571     | BSV |
| EOL-SIB     | 69        | 161       | 3       | TUN |
| FGI_SAA0001 | 68.33019  | 27.55062  | 440     | ENF |
| FGI_SUO0010 | 67.368617 | 26.654067 | 180     | CRO |
| FGI_VUO0002 | 67.361883 | 26.643233 | 180     | ENF |
| FxMt_GDK    | 37.75     | 127.15    | 340     | MF  |
| FxMt_HFK    | 34.55     | 126.57    | 13.74   | CRO |
| FxMt_IRI    | 14.2      | 121.3     | 21      | CRO |
| FxMt_PDF    | 2.345     | 114.03639 | 30      | EBF |
| FxMt_SMK    | 37.938886 | 126.9547  | 293     | MF  |
| FxMt_SWL    | 36.046561 | 138.10839 | 759     | WAT |
| FxMt_TKC    | 36.139722 | 137.37083 | 800     | ENF |
| FxMt_TUR    | 64.208889 | 100.46356 | 250     | DNF |
| FxMt_TWH    | 24.076    | 121.126   | 2076    | EBF |
| FxMt_YLF    | 62.255    | 129.24139 | 220     | DNF |
| GM_Dunhuang | 40.15     | 94.683333 | 1140    | CRO |
| HAWS16      | 38.84931  | 100.36411 | 1564.31 | CRO |
| Lath_AR-SLu | -33.4648  | -66.4598  | 506     | MF  |
| Lath_AU-Cum | -33.61518 | 150.72362 | 27      | EBF |
| Lath_AU-Emr | -23.8587  | 148.4746  | 176     | GRA |
| Lath_AU-RDF | -14.5636  | 132.4776  | 188     | WSA |
| Lath_AU-Rob | -17.1175  | 145.6301  | 712     | EBF |
| Lath_BR-Ban | -9.82442  | -50.1591  | 174     | EBF |
| Lath_BR-Sa1 | -2.85667  | -54.9589  | 198     | EBF |
| Lath_CA-Na1 | 46.4722   | -67.1     | 341     | ENF |
| Lath_CA-Qc2 | 49.7598   | -74.5711  | 393     | MF  |
| Lath_CA-SCC | 61.3079   | -121.2992 | 285     | ENF |
| Lath_DE-SfN | 47.80639  | 11.3275   | 290     | WET |
| Lath_IT-Cp2 | 41.70427  | 12.35729  | 19      | EBF |
| Lath_RU-Vrk | 67.05468  | 62.94047  | 100     | CSH |
| Lath_SD-Dem | 13.2829   | 30.4783   | 500     | SAV |
| Lath_TW-Tar | 24.0312   | 120.688   | 55      | CRO |
| Lath_US-AR2 | 36.6358   | -99.5975  | 646     | GRA |
| Lath_US-An1 | 68.99     | -150.28   | 600     | OSH |
| Lath_US-Bi2 | 38.109    | -121.535  | -4.98   | CRO |
| Lath_US-CRT | 41.628495 | -83.34709 | 180     | CRO |
| Lath_US-Ctn | 43.95     | -101.8466 | 744     | GRA |
| Lath_US-DK1 | 35.9712   | -79.0934  | 161     | GRA |
| Lath_US-DK2 | 35.9736   | -79.1004  | 168     | DBF |
| Lath_US-DK3 | 35.9782   | -79.0942  | 163     | ENF |

---

---

|             |           |           |      |     |
|-------------|-----------|-----------|------|-----|
| Lath_US-KS1 | 28.4583   | -80.6709  | 3    | ENF |
| Lath_US-LPH | 42.5419   | -72.185   | 360  | DBF |
| Lath_US-Me1 | 44.5794   | -121.5    | 896  | ENF |
| Lath_US-Ro2 | 44.7288   | -93.0888  | 292  | CRO |
| Lath_US-Ro5 | 44.691    | -93.0576  | 283  | CRO |
| Lath_US-Ro6 | 44.6946   | -93.05776 | 282  | CRO |
| Lath_US-SFP | 43.2408   | -96.902   | 386  | CRO |
| Lath_US-Tw2 | 38.1047   | -121.6433 | -5   | CRO |
| Lath_US-Tw3 | 38.1159   | -121.6467 | -9   | CRO |
| Lath_US-Tw4 | 38.10298  | -121.6414 | -5   | CRO |
| Lath_US-UM3 | 45.568589 | -84.67072 | 234  | WAT |
| Lath_US-WPT | 41.464639 | -82.99616 | 175  | WET |
| Lath_US-Wi1 | 46.7305   | -91.2329  | 349  | DBF |
| Lath_US-Wi2 | 46.6869   | -91.1528  | 349  | ENF |
| Lath_US-Wi5 | 46.6531   | -91.0858  | 349  | ENF |
| Lath_US-Wi8 | 46.7223   | -91.2524  | 349  | DBF |
| PM-EGP      | 75.6247   | -35.9748  | 2660 | ICE |
| PM-KAN_U    | 67.0003   | -47.0253  | 1840 | ICE |
| PM-NUK_K    | 64.1623   | -51.3587  | 710  | ICE |
| PM-QAS_A    | 61.243    | -46.7328  | 1000 | ICE |
| PM-QAS_M    | 61.0998   | -46.833   | 630  | ICE |
| PM-TAS_A    | 65.779    | -38.8995  | 890  | ICE |
| PM-TAS_U    | 65.6978   | -38.8668  | 570  | ICE |

---

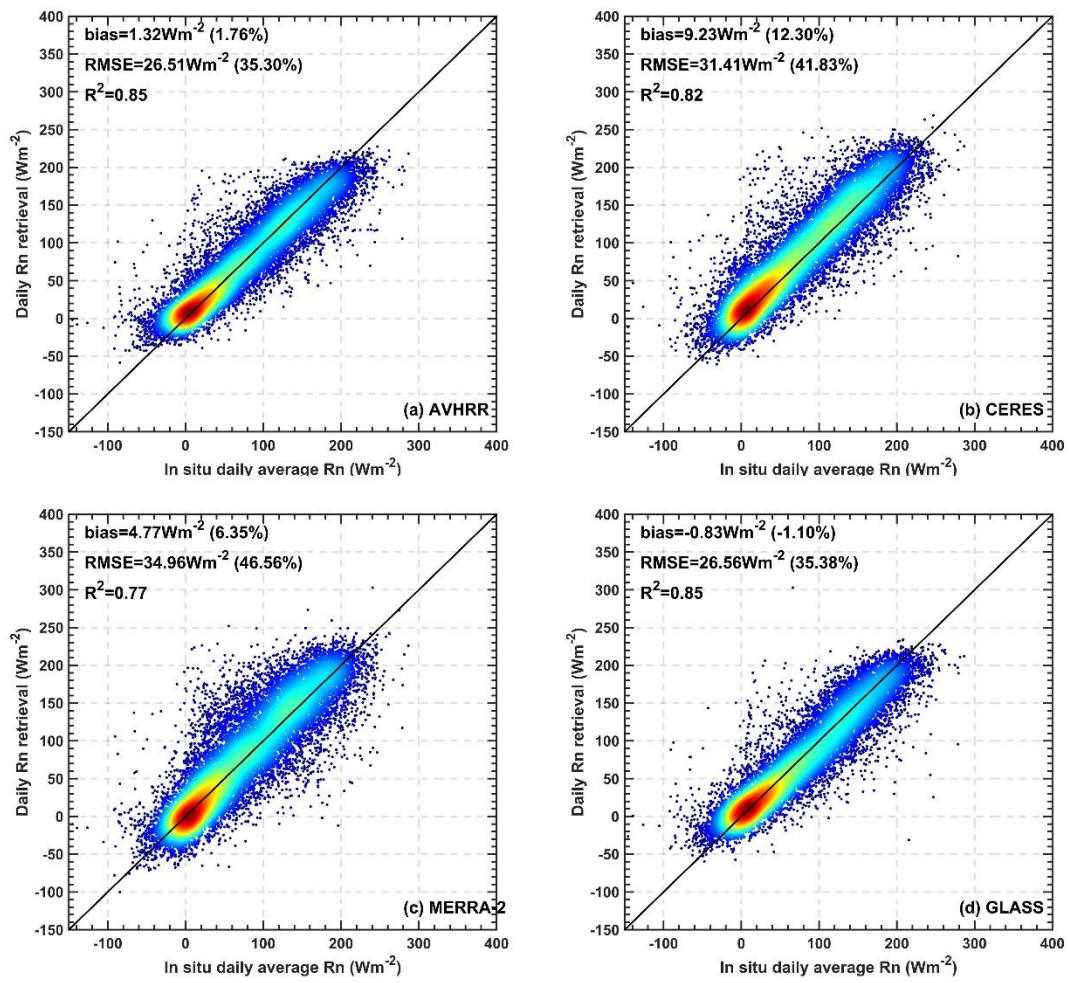

**Fig. S1** Scatterplots of product validation for (a) AVHRR, (b) CERES-SYN, (c) MERRA2 and (d) GLASS at all sites.

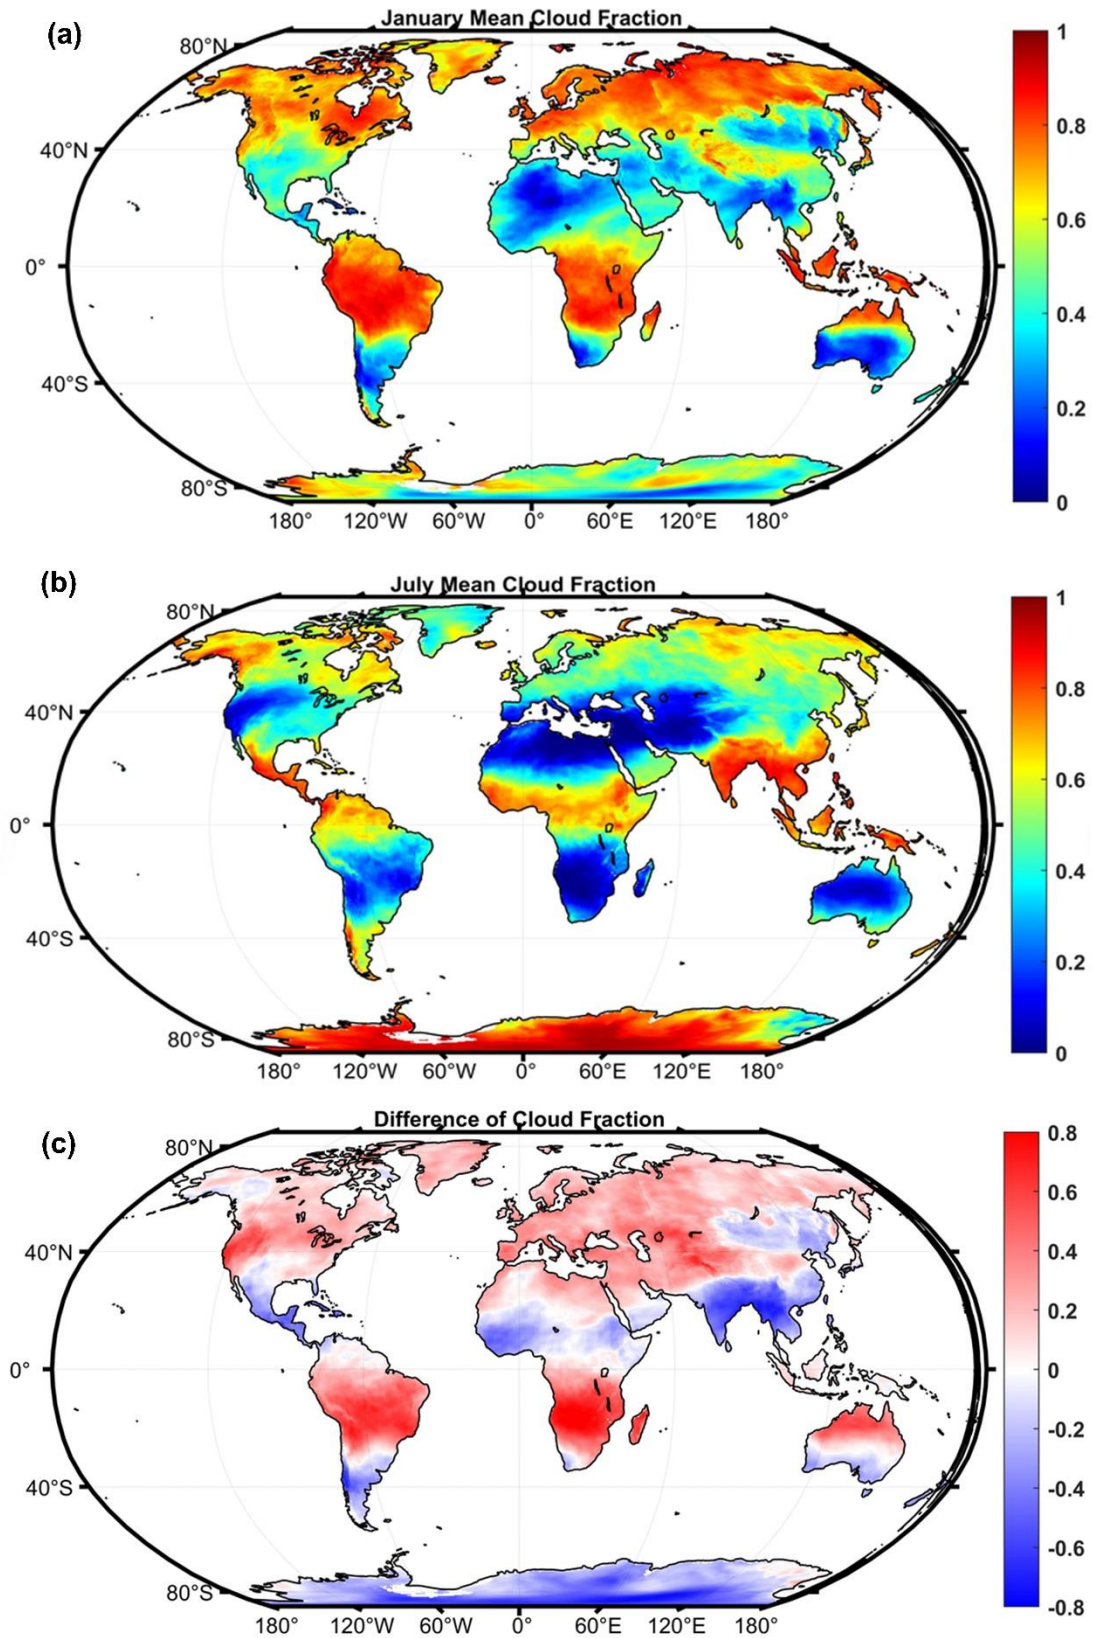

**Fig. S2** Spatial distribution of monthly mean cloud cover fraction in (a) January and (b) July 2008, and (c) their differences of cloud fraction.



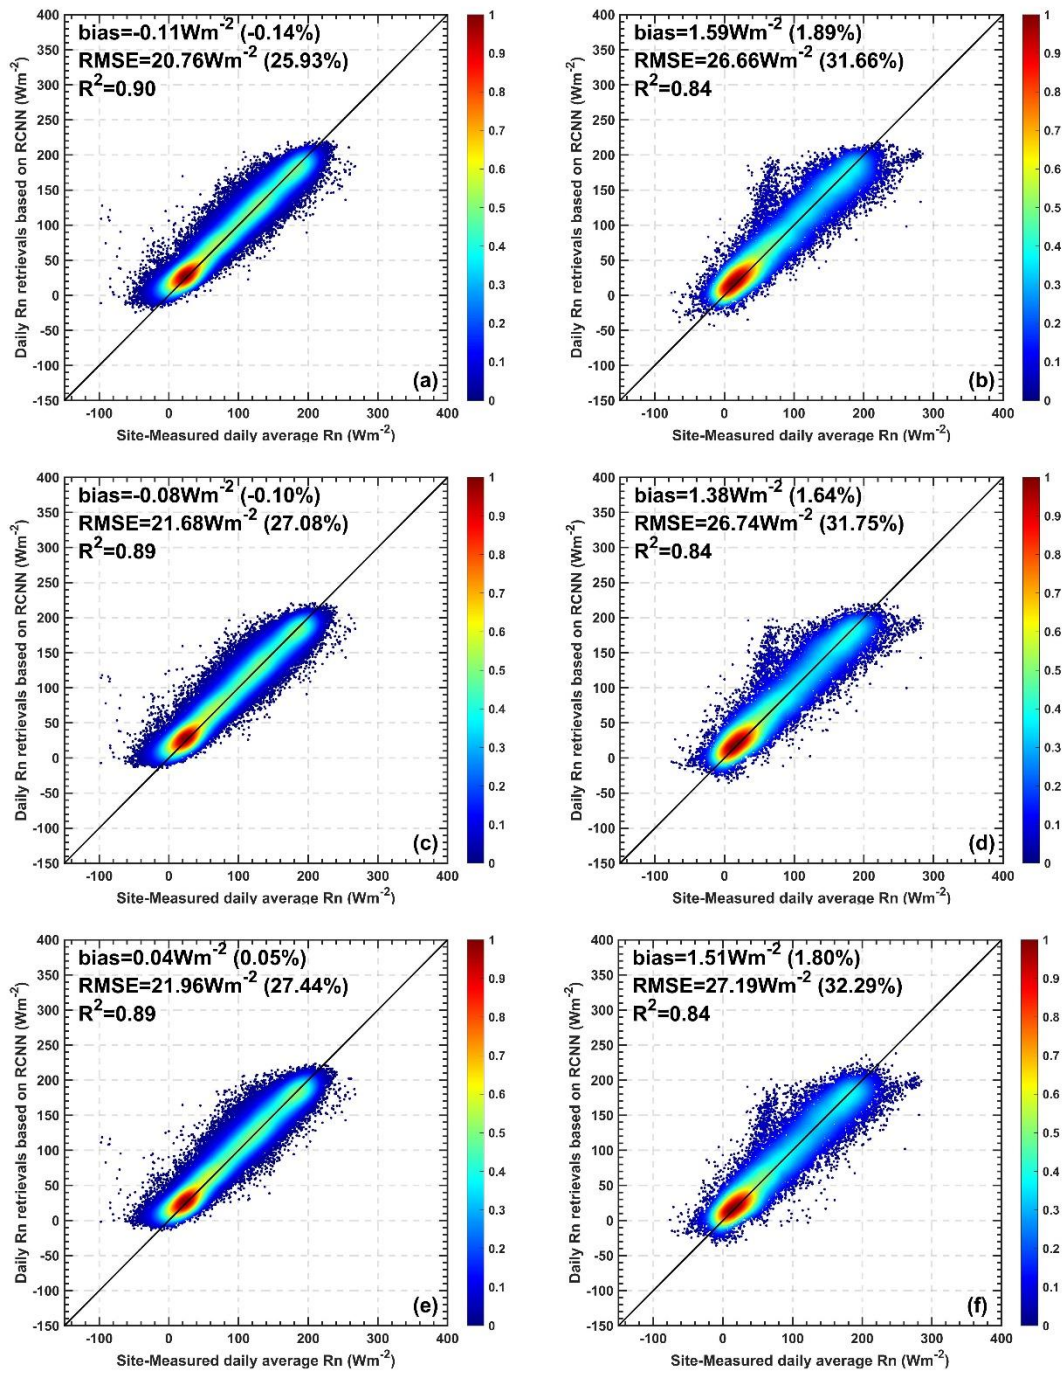

**Fig. S3** Training accuracy and independent test accuracy of RCNN with MERRA2  $R_n$

(a, b), MERRA2 DSR (c, d) and no MERRA2 radiation (e, f).
